# Supplementary material for: Novel crosstalk between Vps26a and Nox4 signaling during neurogenesis
Source: PubMed Central journal article supplement (PMC6748115; doi:10.1038/s41418-018-0226-0), 2018-11-21
Supplement: 41418_2018_226_MOESM1_ESM.pdf [file 41418_2018_226_MOESM1_ESM.pdf]

1 **SUPPLEMENTAL MATERIALS**

2

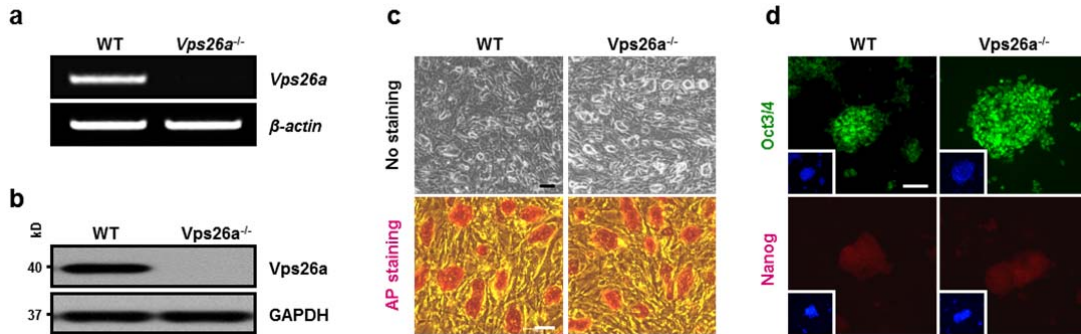

3

4 Supplementary **Figure 1** Derivation of ESCs from *Vps26a*-null blastocysts. **(a, b)** Semi-qPCR and  
5 Western blot analyses of *Vps26a* using WT and *Vps26a*<sup>-/-</sup> ESCs. **(c)** Photographs of exponentially  
6 growing WT and *Vps26a*<sup>-/-</sup> ESCs and AP activity assay. Scale bars, 200  $\mu$ m (upper images) and 50  
7  $\mu$ m (bottom images). **(d)** Immunocytochemical analysis of Oct3/4 (green) and Nanog (red) using WT  
8 and *Vps26a*<sup>-/-</sup> ESCs. DAPI staining data are shown as insets to the respective images. Scale bar, 50  
9  $\mu$ m.

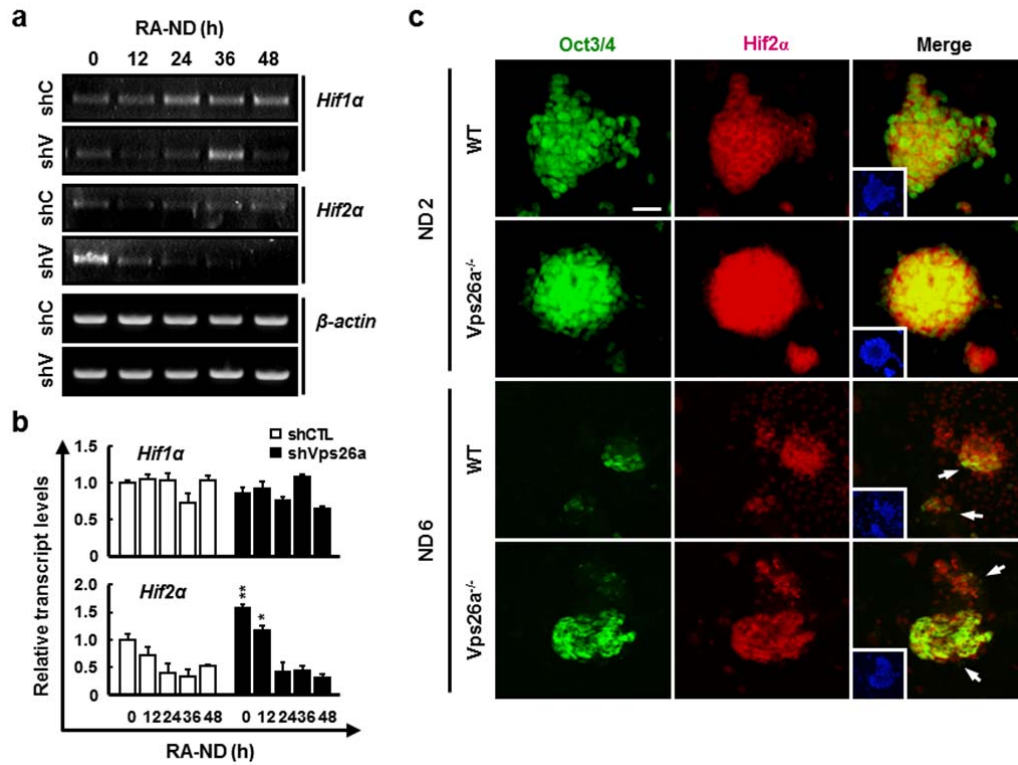

10

11 Supplementary **Figure 2** Vps26a deficiency increases HIF2α during ESC-mediated neurogenesis. **(a,b)**  
 12 The effect of Vps26a deficiency (a) or knockdown (b) on expression of *Hif1α* and *Hif2α* determined  
 13 by semi-qPCR and qPCR analyses using ECCs, respectively, differentiated for the indicated time  
 14 periods. Error bars indicate the means ± SD ( $n = 3$ ). \* $P < 0.05$ ; \*\* $P < 0.01$  compared to shCTL-ECCs  
 15 for each day during RA-ND. **(c)** Double-label immunocytochemical analysis of Hif2α (red) and  
 16 Oct3/4 (green) using WT and *Vps26a*<sup>-/-</sup> ESCs differentiated for 2- (upper panel) and 6 days (bottom  
 17 panel). DAPI staining data are shown as insets to the merged images (yellow). Scale bar, 50 μm.

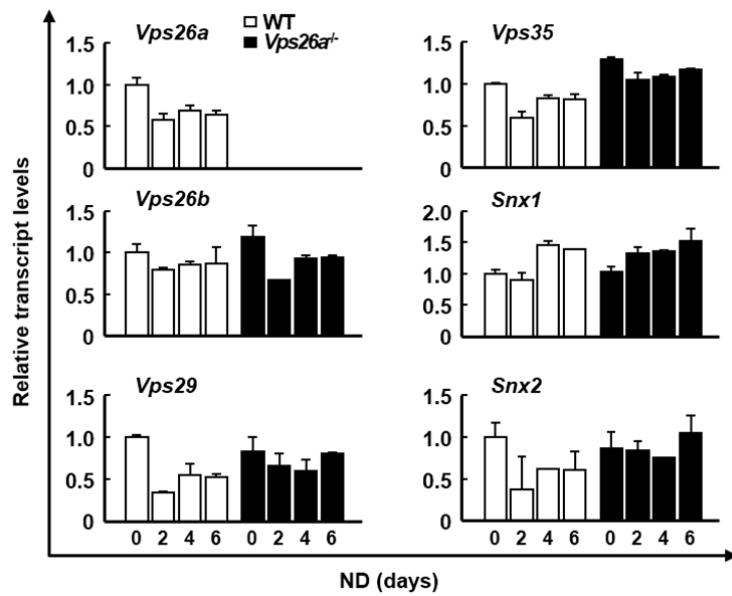

18

19 Supplementary **Figure 3** Expression profiles of the retromer complex genes during neurogenesis from  
 20 ESCs. The effect of *Vps26a*-deficiency on the expression of retromer complex genes (*Vps26a*, *Vps26b*,  
 21 *Vps29*, *Vps35*, *Snx1* and *Snx2*) determined by semi-qPCR analysis using ESCs differentiated for the  
 22 indicated time periods.

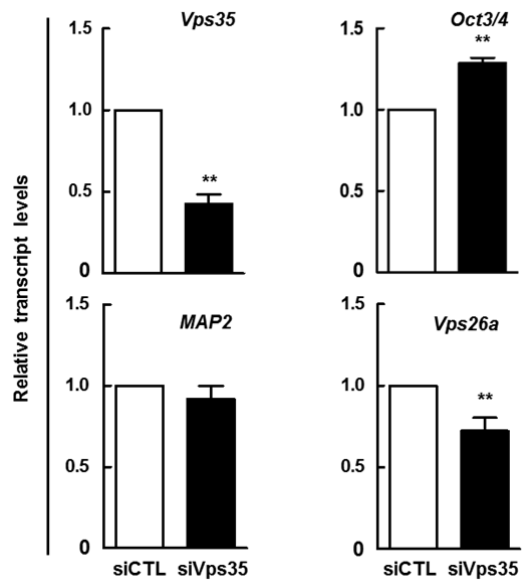

23

24 Supplementary **Figure 4** Knockdown effect of Vps35 in RA-ND. The effects of Vps35 on the  
 25 expression of Oct3/4, MAP2 and Vps26a were determined by qPCR using siCTL- and siVps35-ECCs  
 26 in RA-ND. Error bars indicate the means  $\pm$  SD (n = 3). \* $P < 0.05$ ; \*\* $P < 0.01$  compared to the siCTL  
 27 RA-ND 48h.

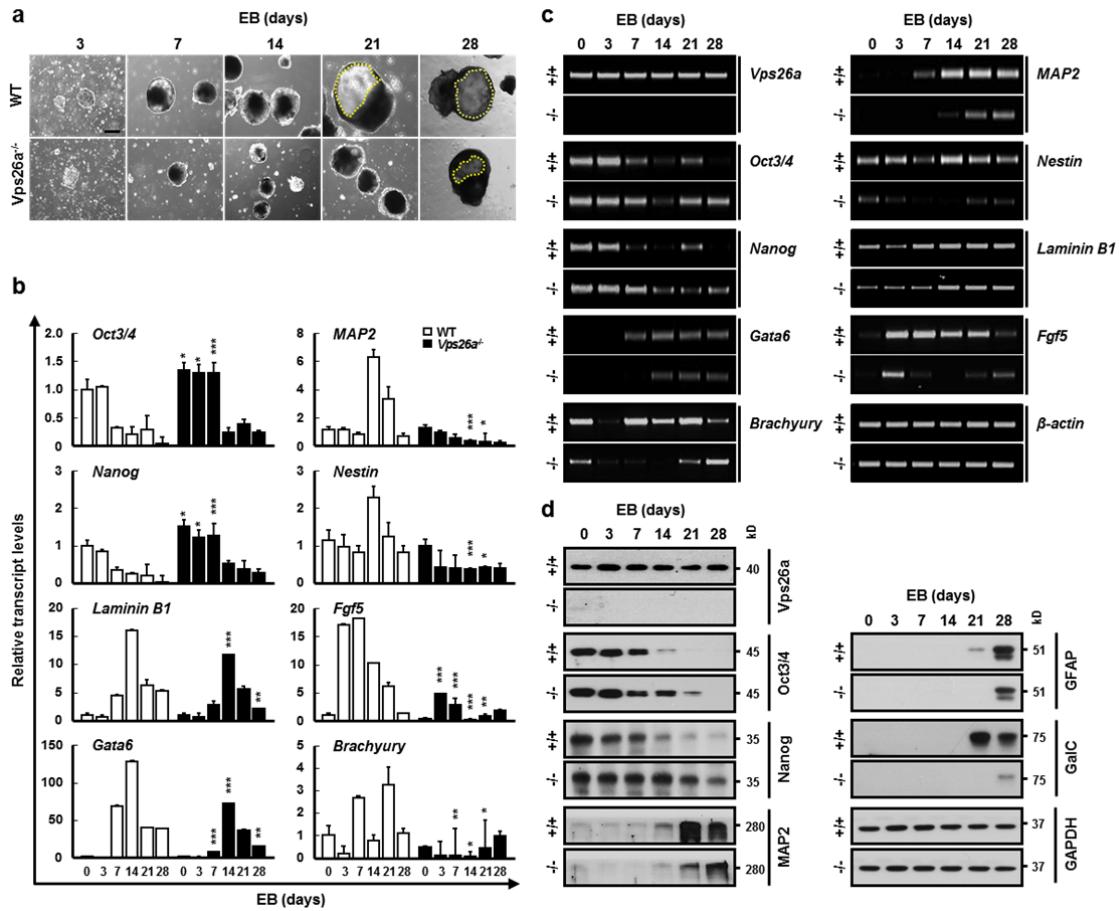

28

29 Supplementary **Figure 5** *Vps26a* deficiency fails to activate differentiation in three germ layers during  
 30 EB formation. **(a)** Representative images of WT and *Vps26a*<sup>-/-</sup> EBs formed over the indicated culture  
 31 periods. Dotted yellow lines indicate cystic cavities. Scale bar, 50 μm. **(b, c)** Expression kinetics of  
 32 ESC stemness and lineage-specific markers, including ectoderm (*MAP2*, *Nestin* and *Fgf5*), mesoderm  
 33 (*Brachyury*) and endoderm (*Gata6* and *Lanimin B1*) were measured by semi-qPCR (b) and qPCR (c)  
 34 analyses using WT (+/+) and *Vps26a*<sup>-/-</sup> (-/-) EBs formed over the indicated culture periods. Error bars  
 35 indicate the means ± SD (*n* = 3). \**P* < 0.05; \*\**P* < 0.01; \*\*\**P* < 0.001 compared to the WT cells each  
 36 day during EBs. **(d)** Western blot analysis for ESC stemness and neural differentiation markers  
 37 (neuron, MAP2; astrocyte, GFAP; oligodendrocyte, GalC) using WT (+/+) and *Vps26a*<sup>-/-</sup> (-/-) EBs  
 38 formed over the indicated culture periods.

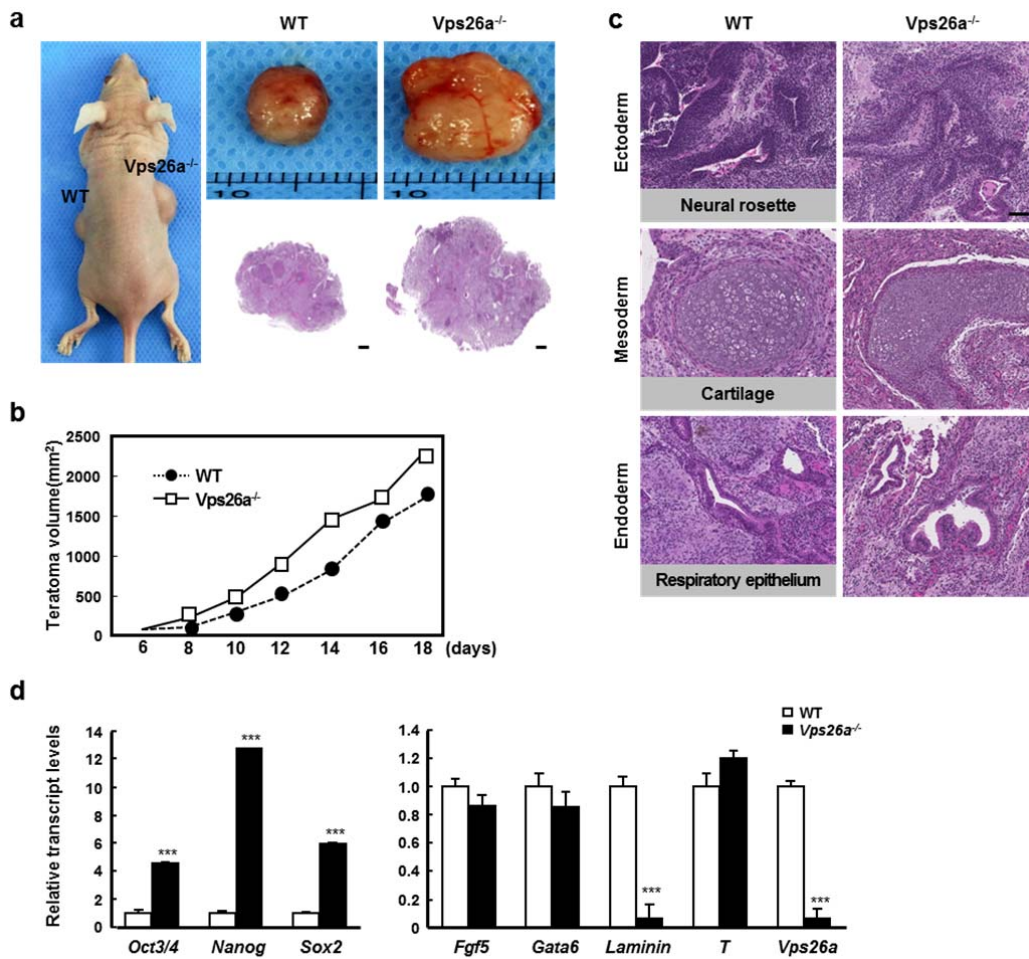

39

40 Supplementary **Figure 6** The *in vivo* differentiation of WT and *Vps26a*<sup>-/-</sup> ESCs into all three germ  
 41 layers. **(a)** Teratoma formation and histological sections of teratomas formed 2–3 weeks after the  
 42 subcutaneous injection of WT and *Vps26a*<sup>-/-</sup> ESCs into BALB/c nude mice. Scale bar, 500  $\mu$ m. **(b)**  
 43 Various tissues in the three germ layers were analyzed using hematoxylin and eosin staining. Scale  
 44 bar, 50  $\mu$ m. **(c)** The change in teratoma size over time was determined by measuring the length and  
 45 width at the indicated times for 18 days. **(d)** Expression kinetics of ESC stemness and lineage-specific  
 46 markers were measured by qPCR (C) analyses using WT and *Vps26a*<sup>-/-</sup> teratomas. Error bars indicate  
 47 the means  $\pm$  SD ( $n = 5$ ). \*\*\* $P < 0.001$  compared to the WT teratomas.

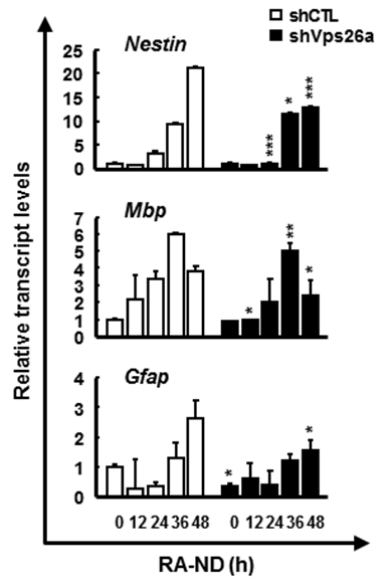

48

49 Supplementary **Figure 7** The effect of Vps26a knockdown on glial differentiation from P19 ECCs.

50 shCTL- and shVps26a-ECCs were differentiated in RA-NBM for 48 h and subjected to qPCR

51 analysis of *Nestin*, *Mbp* and *Gfap*. Error bars indicate the means  $\pm$  SD ( $n = 3$ ). \* $P < 0.05$ ; \*\* $P < 0.01$ ;

52 \*\*\* $P < 0.001$  compared to shCTL for each day during ND.

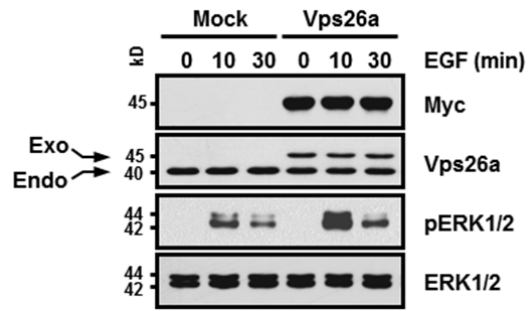

53

54 Supplementary **Figure 8** The effect of Vps26a overexpression on ERK1/2 activation in HEK293 cells.

55 HEK293 cells transiently transfected with the vector overexpressing Vps26a (pcDNA6/Myc-hVps26a)

56 were cultured under serum-free condition for 6 h, stimulated with 10 ng/ml of EGF for the indicated

57 periods, and subjected to Western blot analysis of Myc, Vps26a, pERK1/2 and ERK1/2.



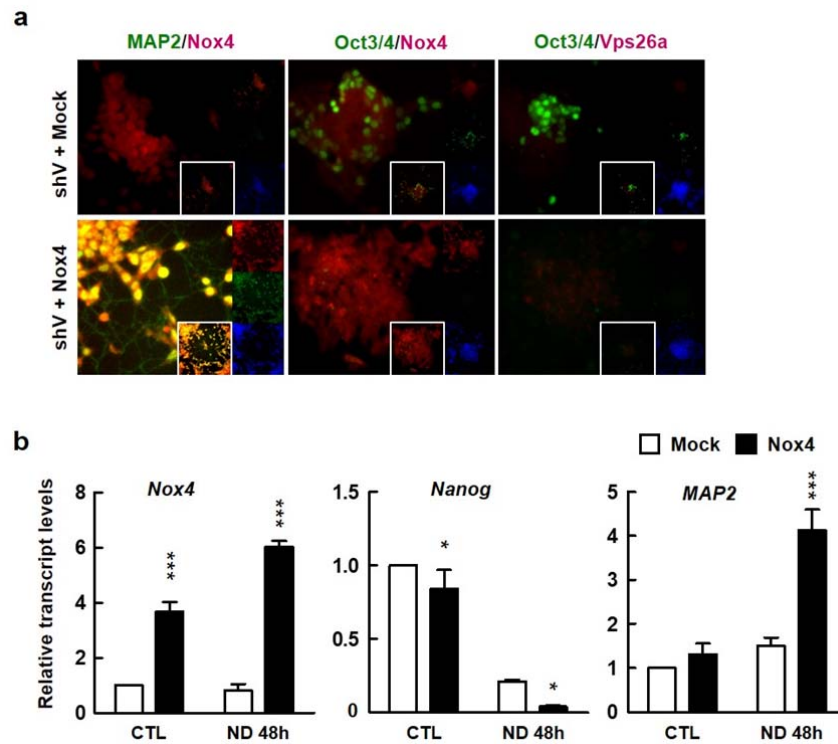

58

59 Supplementary **Figure 9** The effect of Nox4 overexpression on RA-ND from shVps26a-ECCs.  
 60 shVps26a (shV) -ECCs transiently transfected with the vector overexpressing Nox4 (pCMV6-Myc-  
 61 DDK-Nox4) or Mock were differentiated in RA-NBM for 48 h. (a) Double-label  
 62 immunocytochemical analysis of MAP2 (green), Oct3/4 (green), Nox4 (red) and Vps26a (red). DAPI  
 63 staining data are shown as insets to the merged image. Scale bar, 50  $\mu$ m. (b) The mRNA level of *Nox4*,  
 64 *Nanog* and *MAP2* were evaluated via qPCR analysis. Error bars indicate the means  $\pm$  SD ( $n = 3$ ). \* $P <$   
 65 0.05; \*\*\* $P < 0.001$  compared to the shVps26a+Mock.

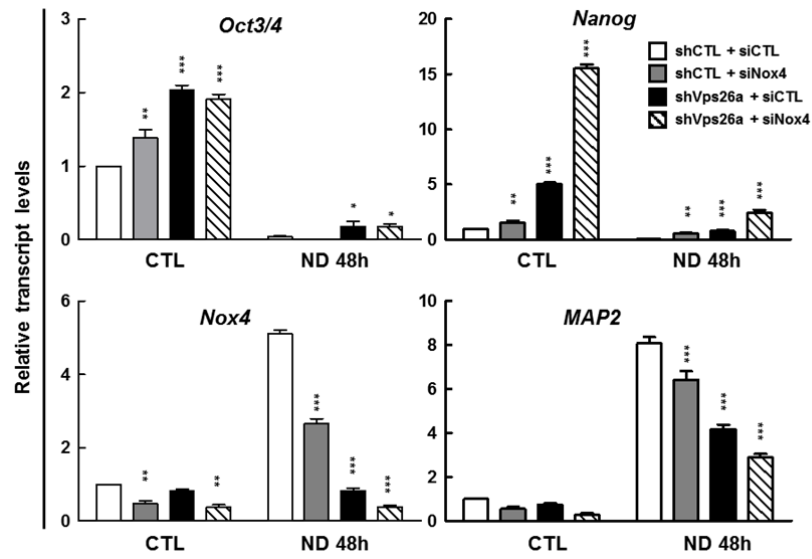

66

67 Supplementary **Figure 10** Decreased expression of Nox4 restores stemness and inhibits neurogenesis.

68 After shCTL and shVps26a-ECC were transfected with siCTL and siNox4, qPCR analysis was

69 performed on *Oct3/4*, *Nanog*, *Nox4* and *MAP2*. Error bars indicate the means ± SD ( $n = 3$ ). \* $P < 0.05$ ;

70 \*\* $P < 0.01$ ; \*\*\* $P < 0.001$  compared to the siCTL.

71

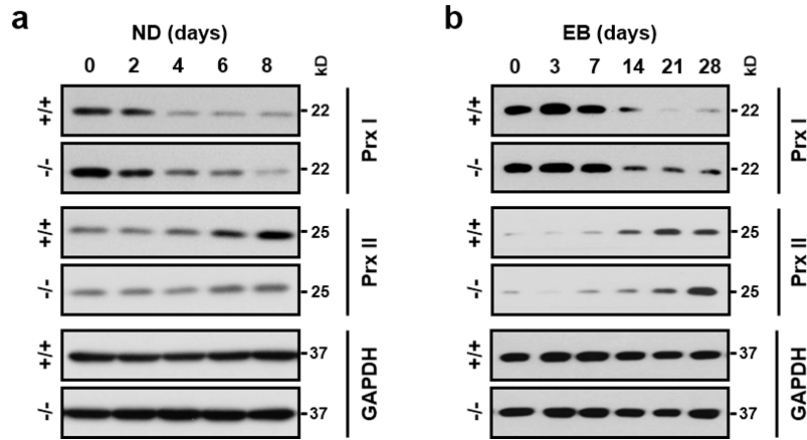

72

73 Supplementary **Figure 11** Expression profiles of Prx I and Prx II during ESC-mediated neurogenesis.

74 **(a, b)** The effect of *Vps26a* deficiency on expression of Prx I and Prx II determined by Western blot

75 analysis using ESCs (a) and EBs (b) differentiated for the indicated time periods. GAPDH was used

76 as the loading control. +/+, WT; -/-, *Vps26a*<sup>-/-</sup>.

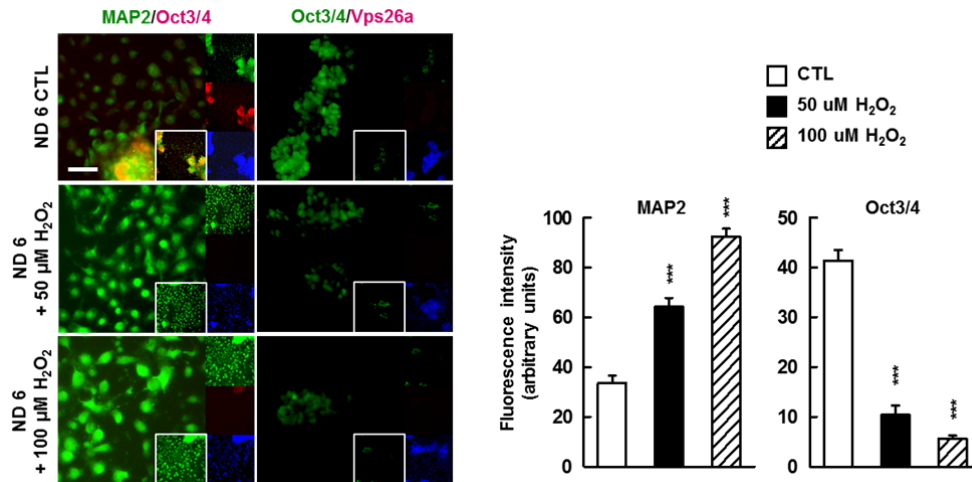

77

78 Supplementary **Figure 12** Effects of H<sub>2</sub>O<sub>2</sub> on the expression of Oct3/4 and MAP2 during neural  
 79 differentiation of *Vps26a*<sup>-/-</sup> ESCs. *Vps26a*<sup>-/-</sup> ESCs were differentiated in the presence or absence of  
 80 H<sub>2</sub>O<sub>2</sub> (50 μM and 100 μM) for 4 days and subjected to immunocytochemical analysis of MAP2 and  
 81 Oct3/4. Quantitative analysis of the fluorescence intensity was analysis by Image J software (*n* = 3 for  
 82 each group). Error bars indicate the means ± SD. \*\*\**P* < 0.001 compare to the *Vps26a*<sup>-/-</sup> ND 6 CTL.

83

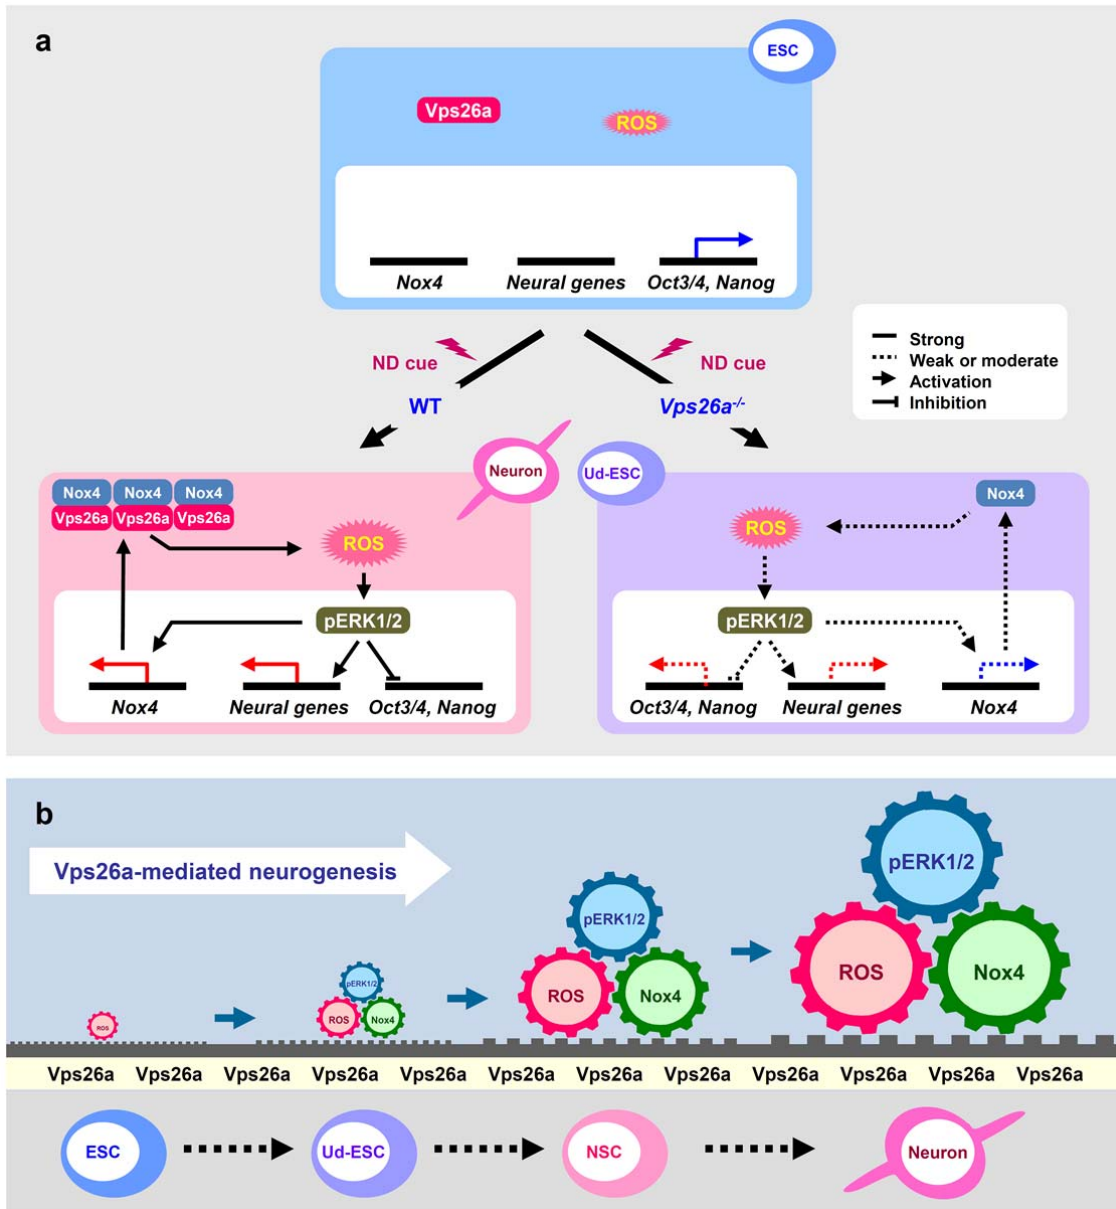

85 Supplementary **Figure 13** Schematic illustration of a hypothetical model for ESC-mediated  
 86 neurogenesis governed by interaction between Vps26a and Nox4 promote activation of the  
 87 ROS/ERK1/2 axis. (a) In self-renewing ESCs, ROS are maintained at lower levels. Under a  
 88 differentiation stimulus, Nox4 expression was upregulated, causing a significant increase in ROS  
 89 levels, and leading to activation of the ERK1/2 signaling pathway. The activated ERK1/2 shut down

90 the expression of stemness markers and induced transcription of neural genes. In addition, Vps26a  
91 interacted with Nox4 was further upregulated by the activated ERK1/2 pathway, which resulted in a  
92 large increase in ROS levels and subsequent hyper-activation of ERK1/2. Ultimately, many more  
93 neural genes were switched on by the activated Nox4/ROS/ERK1/2 cascade, and ESCs actively  
94 differentiated into neurons. However, the cascading between Nox4, ROS and ERK1/2 was severely  
95 impaired in differentiating *Vps26a*<sup>-/-</sup> ESCs, enabling the ESCs to maintain their undifferentiated state  
96 (Ud-ESCs) for a relatively long period compared to the WT. **(b)** Crosstalk between Vps26a and the  
97 Nox4/ROS/ERK1/2 cascade leads to ESC-mediated neurogenesis. Vps26a-mediated  
98 stemness/differentiation transition was highly dependent on the cyclic cascade between Nox4, ROS  
99 and ERK1/2.

100 Supplementary Table 1. Information on PCR primers used in this study.

| Target genes                    | Accession number | Primer sequences       |                         | Product size (bp) |
|---------------------------------|------------------|------------------------|-------------------------|-------------------|
|                                 |                  | Forward                | Reverse                 |                   |
| <i>Oct3/4</i>                   | NM_013633.3      | ggtggaaccaactcccagg    | accttccaagagaacgccc     | 150               |
| <i>Nanog</i>                    | NM_028016.3      | caaaggatgaagtgaagcgg   | ggtgctgagcccttctgaatc   | 80                |
| <i>MAP2</i>                     | NM_008632.2      | actgccggacctgaagaatg   | agtaacaattgtacctgacccc  | 91                |
| <i>Tubb3</i>                    | NM_023279.2      | atgtcgtgcgaaagagtgt    | cttgctgatgagcagtgtgc    | 110               |
| <i>Nestin</i>                   | NM_016701.3      | catacaggactctgctggagg  | aggtgctggctctctggtat    | 130               |
| <i>Mbp</i>                      | NM_001025256.2   | tgtgccacatgtacaaggact  | gatggagggtgtgttcgagg    | 145               |
| <i>Gfap</i>                     | NM_001131020.1   | cagatccgagggggcaaaag   | tggcagggctccatttcaa     | 123               |
| <i>Gata6</i>                    | NM_010258.3      | gctgaacggaacgtaccacc   | acagtggcgtctggatggag    | 236               |
| <i>Laminin B1</i>               | NM_008482.2      | ccccaatctctgtgaacctg   | gcaattgcaccgacctga      | 119               |
| <i>Brachyury</i>                | NM_009309.2      | ggtggcttctctcctggtgc   | gtaggtgggctggcgttat     | 292               |
| <i>Fgf5</i>                     | NM_010203.5      | aaagtcaatggctcccacgaa  | ggcacttgcattgagttttcc   | 141               |
| <i>Vps26a</i>                   | NM_133672.3      | gaagtggcattgaagactg    | gtgctgggtccaattcctg     | 170               |
| <i>Vps26b</i>                   | NM_178027.4      | ggacagaatgtgaagctccg   | caatcctcaatgccaacttc    | 152               |
| <i>Vps29</i>                    | NM_019780.1      | cgtccacatcgtgagaggag   | tgtcctgagataagaatgtccac | 180               |
| <i>Vps35</i>                    | NM_022997.4      | aacacagaaatcgtctcagg   | cagatgaataaatcggccaac   | 150               |
| <i>Snx1</i>                     | NM_019727.2      | cccttactctcatcctccg    | cataggcattcataccatccc   | 150               |
| <i>Snx2</i>                     | NM_026386.1      | gatcttttcgcagaagccac   | cttcaatctcgtccctggat    | 184               |
| <i>Hif1a</i>                    | NM_010431.2      | ggcgagaacgagaagaaaaag  | gaagtggcaactgatgagca    | 124               |
| <i>Hif2a</i>                    | NM_010137.3      | gtgaccaagacggtgacat    | ctcacggatctcctcatggt    | 132               |
| <i>Nox1</i>                     | NM_172203.2      | gtaggtgtcatatgggtgca   | gcctccctaggagcaatctg    | 105               |
| <i>Nox2</i>                     | NM_007807.5      | ccctccctgtctaggtaatgc  | tagcatttgccttcggtgat    | 102               |
| <i>Nox3</i>                     | NM_198958.2      | gatgtatttactaccccgtgag | ctcaggcaggctctgtgatt    | 117               |
| <i>Nox4</i>                     | NM_015760.5      | aacacctctgcctgctcat    | acacaatcctaggcccaaca    | 122               |
| <i><math>\beta</math>-Actin</i> | NM_007393.3      | cagcttctttgcagctcctt   | cacgatggagggaatacag     | 157               |
| <i>Gapdh</i>                    | NM_008084.3      | agaacatcatcctgcatcc    | cacattggggtaggaacac     | 110               |

101

102 Supplementary Table 2. Information of antibodies used in the study.

| <b>Antibody</b> | <b>Type</b> | <b>Host</b> | <b>Supplier</b>          | <b>Catalog No.</b> |
|-----------------|-------------|-------------|--------------------------|--------------------|
| Oct3/4          | Monoclonal  | Mouse       | Santa Cruz Biotechnology | SC-5279            |
| Nanog           | Polyclonal  | Rabbit      | Novus biological         | NBP2-19469         |
| MAP2            | Polyclonal  | Rabbit      | EMD Millipore            | AB5622             |
| Tubb3           | Monoclonal  | Mouse       | EMD Millipore            | MAB1637            |
| GFAP            | Monoclonal  | Mouse       | EMD Millipore            | MAB360             |
| GalC            | Monoclonal  | Mouse       | EMD Millipore            | MAB342             |
| Vps26a          | Polyclonal  | Rabbit      | Abcam                    | AB23892            |
| pp38            | Polyclonal  | Rabbit      | Cell Signaling           | 4511               |
| pAKT            | Polyclonal  | Rabbit      | Cell Signaling           | 4060               |
| pERK1/2         | Polyclonal  | Rabbit      | Cell Signaling           | 4370               |
| pJNK            | Polyclonal  | Rabbit      | Cell Signaling           | 9251               |
| GST             | Polyclonal  | Rabbit      | Cell Signaling           | 2622               |
| Nox4            | Polyclonal  | Rabbit      | Proteintech              | 14347-1-AP         |
| Prx I           | Polyclonal  | Rabbit      | Abfrontier               | LF-PA0095          |
| Prx II          | Polyclonal  | Rabbit      | Abfrontier               | LF-PA0091          |
| HA              | Monoclonal  | Rat         | Roche                    | 11867423001        |
| Myc             | Polyclonal  | Rabbit      | Origene                  | TA150081           |
| GAPDH           | Polyclonal  | Rabbit      | Abfrontier               | LF-PA0212          |

103



## 104 **Supplementary materials and methods**

### 105 *siRNA-mediated knockdown of mRNA*

106 The following small interfering RNA (siRNA) target sequences were used against mouse Vps35  
107 and Nox4. ON-TARGET plus mouse siRNA oligos (Thermo Scientific Dharmacon, Waltham, MA,  
108 USA) for Vps35 (L-063309-01-0010) have been previous tested and verified to knockdown Vps35  
109 gene expression<sup>1</sup> and for Nox4 (L-058509-00-0010) have been previous tested and verified to  
110 knockdown Nox4 gene expression<sup>2</sup>, scrambled siRNA (D-001810-10-20) were transfected into cells  
111 using Lipofectamine RNAiMAX Reagent (Life Technologies) according to the manufacturer's  
112 instructions.

113

### 114 *Nox4 overexpression*

115 For Nox4 overexpression experiments, plasmid DNA encoding mouse Nox4 cDNA (pCMV6-  
116 Myc-DDK-tagged; NM\_015760, #MR227192; Origene)<sup>3</sup> or empty vector as a control using 4D  
117 Nucleofector™ (Lonza), according to the manufacturer's instructions.

118

119

## 120 **Supplementary reference**

- 121 1. Mir R, Tonelli F, Lis P, Macartney T, Polinski NK, Martinez TN, *et al.* The Parkinso  
122 n's disease VPS35[D620N] mutation enhances LRRK2-mediated Rab protein phosphoryl  
123 ation in mouse and human. *Biochem J* 2018, **475**(11): 1861-1883.
- 124 2. Jayavelu AK, Muller JP, Bauer R, Bohmer SA, Lassig J, Cerny-Reiterer S, *et al.* NO  
125 X4-driven ROS formation mediates PTP inactivation and cell transformation in FLT3IT  
126 D-positive AML cells. *Leukemia* 2016, **30**(2): 473-483.
- 127 3. Moon JS, Nakahira K, Chung KP, DeNicola GM, Koo MJ, Pabon MA, *et al.* NOX4-  
128 dependent fatty acid oxidation promotes NLRP3 inflammasome activation in macrophage
